# Supplementary material
Source: Springer Nature journal article supplement (https://www.springermedizin.de/resource/supplementary/12968_2010_1428_MOESM7_ESM.pdf/9580110)

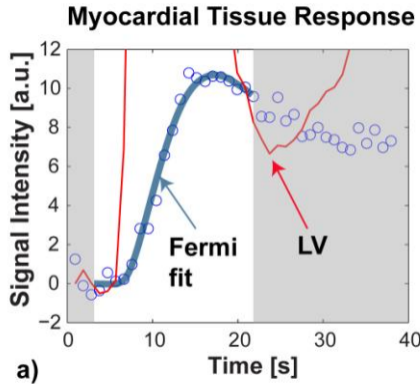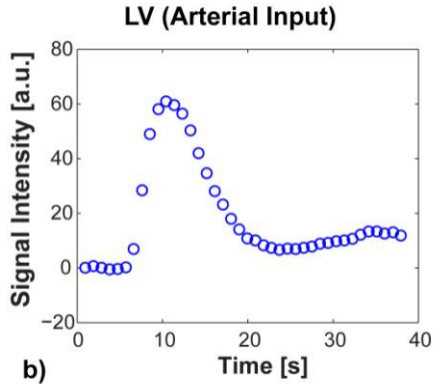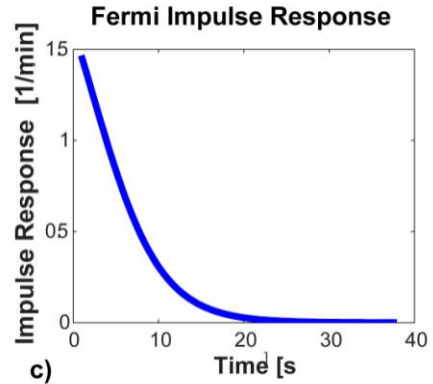

Supplement: MOESM7 [file 9580110]
